# Supplementary material for: Recent advances in ex ante techno-environmental-economic assessment of thermochemical waste or biomass to energy technologies based on process simulation
Source: Royal Society of Chemistry journal article supplement (doi:10.1039/d4gc06016d), 2025-01-01
Supplement: d4gc06016d1.pdf [file d4gc06016d1.pdf]

*Supplementary Material for the Tutorial Review*

**Recent advances in ex-ante techno-environmental-economic assessment of  
thermochemical waste or biomass to energy technologies based on process simulation**

Jiehong Tang<sup>a,b</sup>, Yuting Tang<sup>a,b,\*</sup>, Hongyu Liu<sup>a,b</sup>, Xinfei Chen<sup>c</sup>, Xikui Zhang<sup>a,b</sup>, Yin Chen<sup>a,b</sup>,  
Shuang Liang<sup>a,b</sup>, Junxuan Huang<sup>a,b</sup>, Wen Teng<sup>a,b</sup>, Ziwei Sun<sup>a,b</sup>, Xiaoqian Ma<sup>a,b</sup>

<sup>a</sup> School of Electric Power Engineering, South China University of Technology, Guangzhou 510640,  
China

<sup>b</sup> Guangdong Province Key Laboratory of Efficient and Clean Energy Utilization, Guangzhou 510640,  
China

<sup>c</sup> Guangzhou Institute of Energy Conversion, Chinese Academy of Sciences, Guangzhou 510640, China

\* *Corresponding Author, Email: [eptangyt@scut.edu.cn](mailto:eptangyt@scut.edu.cn)*

Table S1 Coefficients for functions of equilibrium constants of reactions<sup>1</sup>

| Reaction                                | $\ln K = b_0 + b_1T + b_2T^{-1} + b_3\ln T + b_4T^2 + b_5T^{-2}$ |                         |            |        |                        |                        |
|-----------------------------------------|------------------------------------------------------------------|-------------------------|------------|--------|------------------------|------------------------|
|                                         | $b_0$                                                            | $b_1$                   | $b_2$      | $b_3$  | $b_4$                  | $b_5$                  |
| $C + CO_2 \leftrightarrow 2CO$          | 25.655                                                           | $-0.352 \times 10^{-3}$ | -21574.471 | -0.476 | 0                      | $0.981 \times 10^5$    |
| $C + H_2O \leftrightarrow CO + H_2$     | 7.643                                                            | $-0.624 \times 10^{-3}$ | -15702.009 | 1.384  | 0                      | $0.399 \times 10^5$    |
| $C + 2H_2 \leftrightarrow CH_4$         | 32.542                                                           | $3.733 \times 10^{-3}$  | 7082.849   | -6.567 | $-0.36 \times 10^{-6}$ | $-0.36 \times 10^{-6}$ |
| $CO + H_2O \leftrightarrow CO_2 + H_2$  | -18.014                                                          | $-0.269 \times 10^{-3}$ | 5872.461   | 1.86   | 0                      | -58200                 |
| $CH_4 + H_2O \leftrightarrow CO + 3H_2$ | -24.898                                                          | $-4.354 \times 10^{-3}$ | -22784.858 | 7.951  | $0.36 \times 10^{-6}$  | 4850                   |

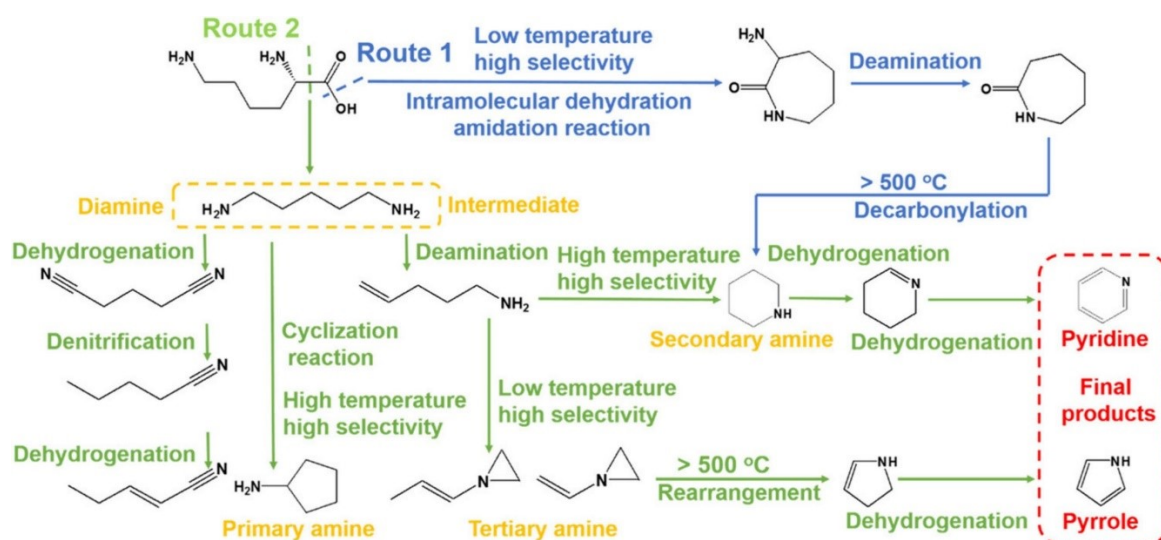

Fig. S2 Example of molecular-level mechanistic model (Reprinted with the permission.<sup>2</sup>

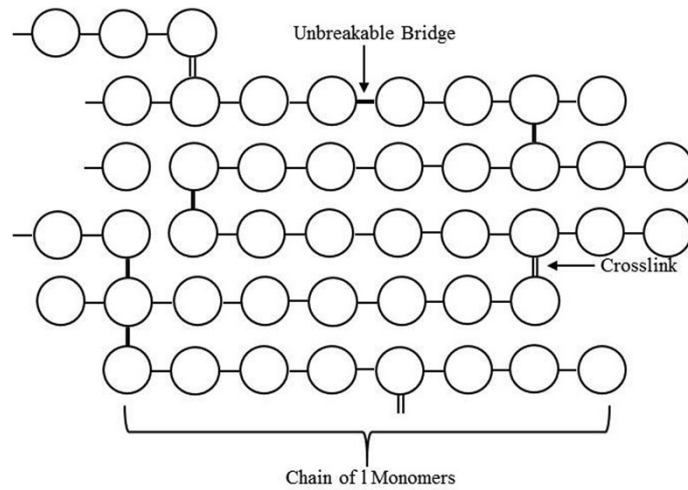

Fig. S3 Example of particle-level network model (Reprinted with the permission.<sup>3</sup> Copyright 2019, 2020, and 2023, Elsevier Ltd)

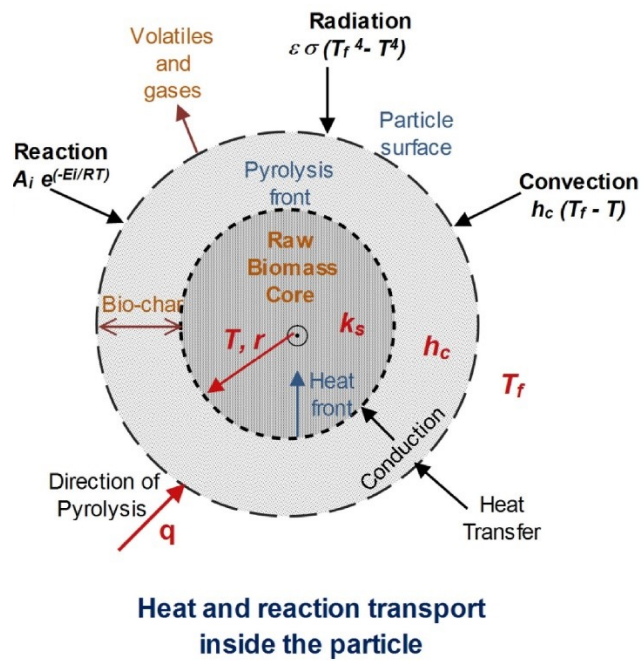

Fig. S4 Example of particle-level heat and mass transport model (Reprinted with the permission.<sup>4</sup> Copyright 2019, 2020, and 2023, Elsevier Ltd)

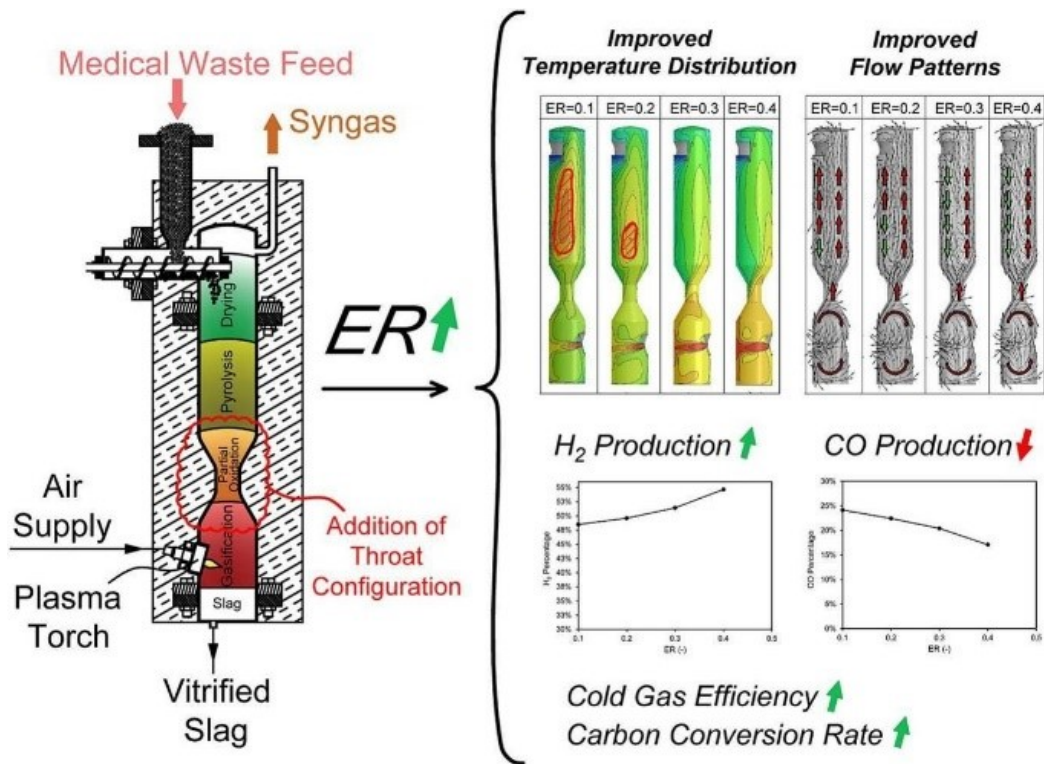

Fig. S5 Example of reactor-level CFD model (Reprinted with the permission.<sup>5</sup> Copyright

2019, 2020, and 2023, Elsevier Ltd)

# 1. Moving grate reactor

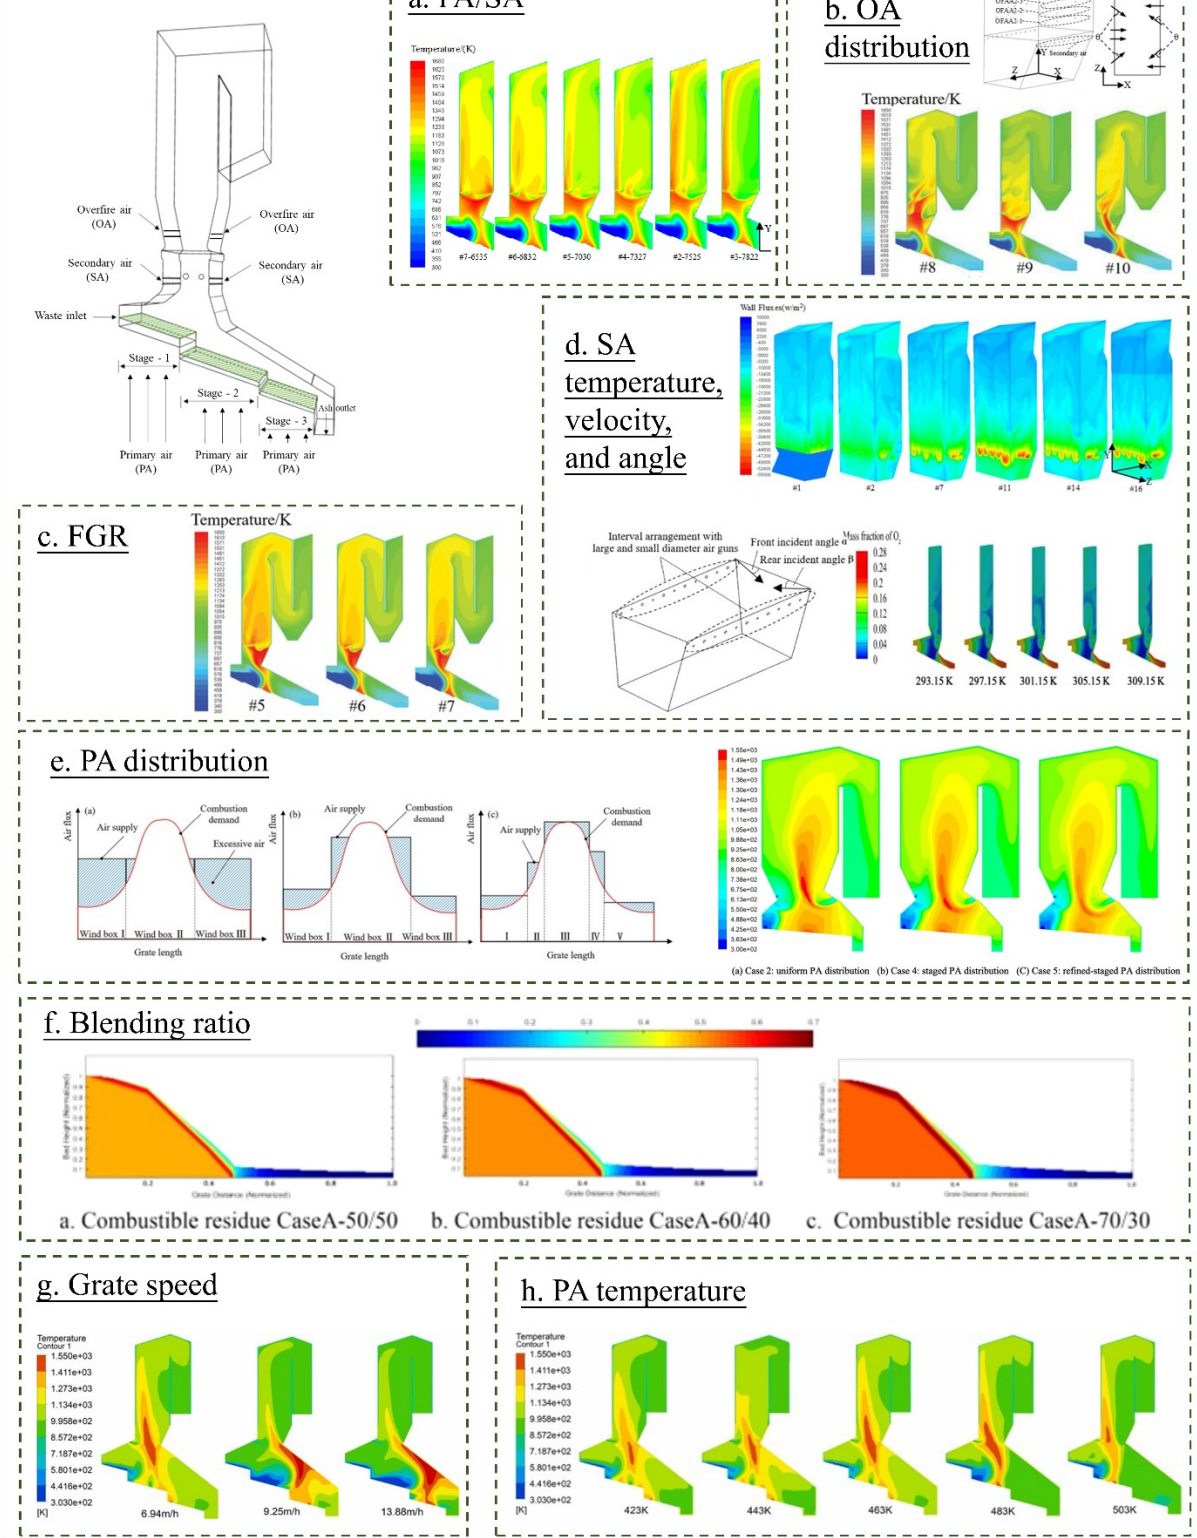

Fig. S6 Recent concentrations of local operational conditions in 1.moving grate reactor. Reprinted with the permission.<sup>6</sup> Copyright 2024, Elsevier Ltd.. Effect of (a) PA/SA. Reprinted with the permission.<sup>7</sup> Copyright 2022, Elsevier Ltd. (b) OA distribution. Reprinted with the permission.<sup>8</sup>

Copyright 2021, Elsevier Ltd. (c) FGR. Reprinted with the permission.<sup>8</sup> Copyright 2021, Elsevier Ltd.  
(d) SA temperature, velocity, and angle. Reprinted with the permission.<sup>7,9</sup> Copyright 2022 and 2024,  
Elsevier Ltd. (e) PA distribution. Reprinted with the permission.<sup>10</sup> Copyright 2023, Elsevier Ltd. (f)  
Blending ratio. Reprinted with the permission.<sup>11</sup> Copyright 2020, Elsevier Ltd. (g) Grate speed.  
Reprinted with the permission.<sup>12</sup> Copyright 2024, Elsevier Ltd. (h) PA temperature. Reprinted with the  
permission.<sup>12</sup> Copyright 2024, Elsevier Ltd.

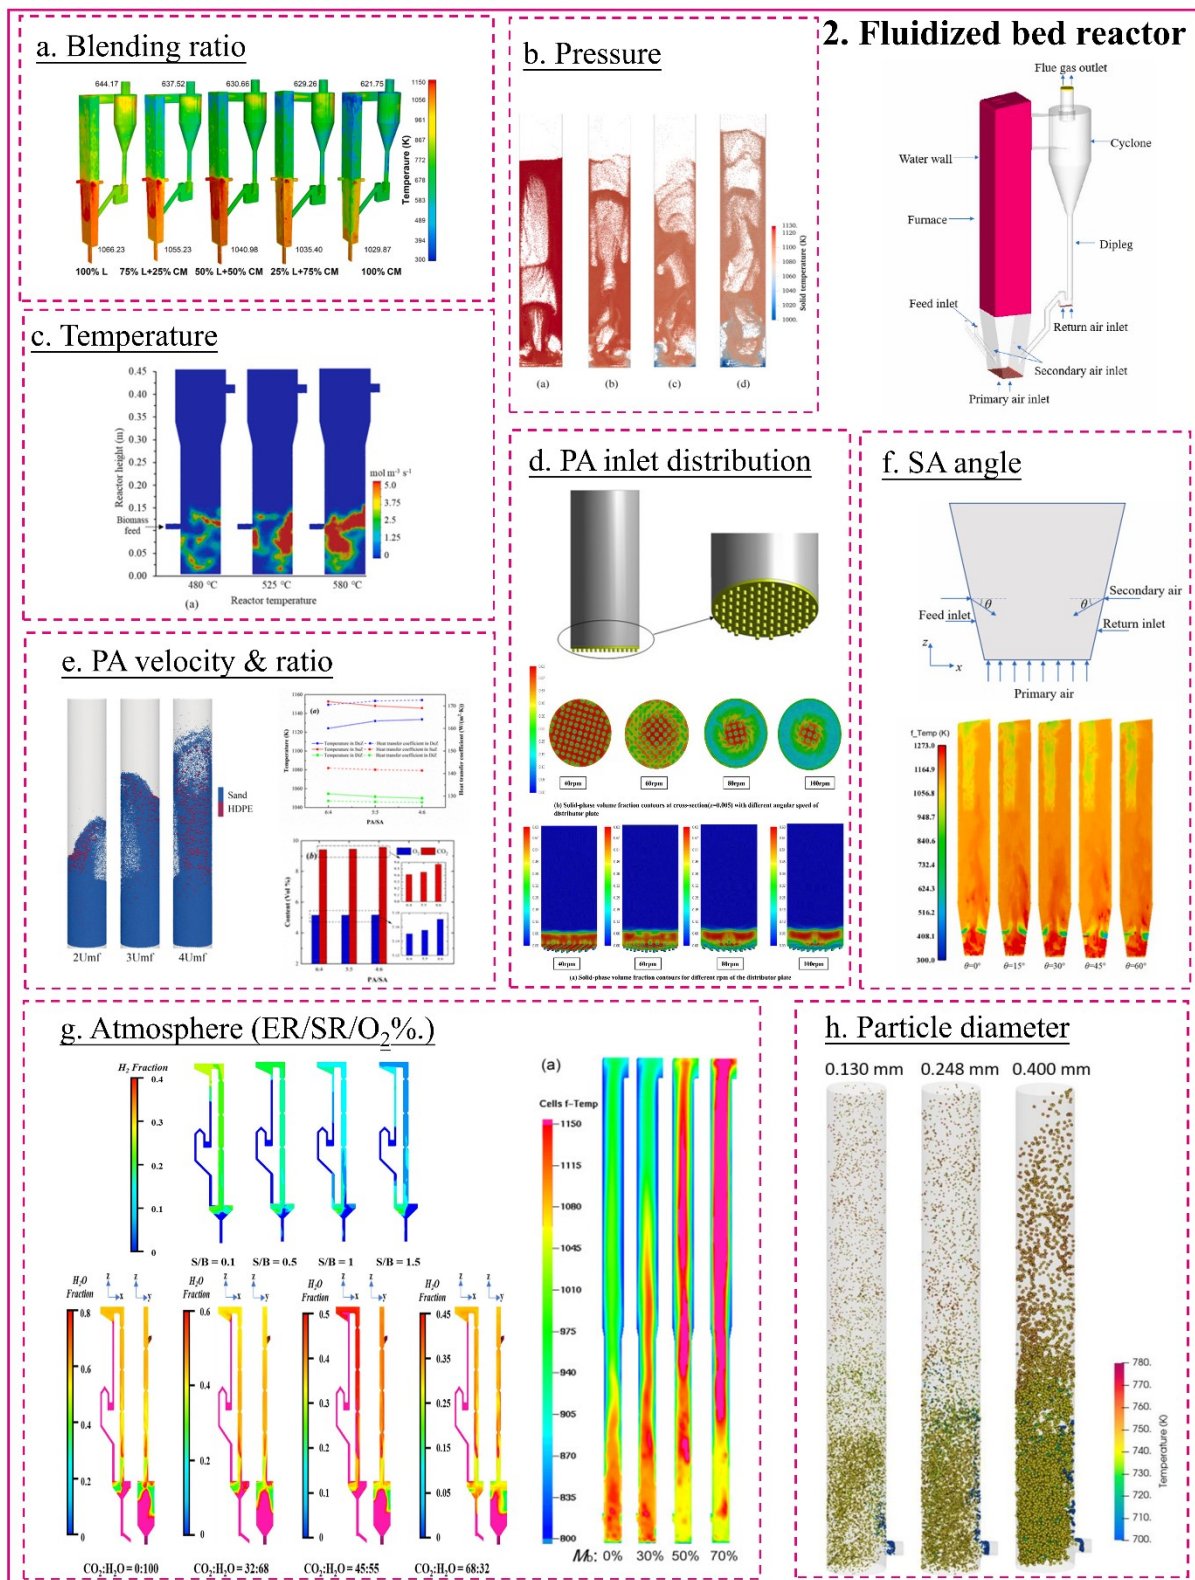

Fig. S7 Recent concentrations of local operational conditions in 2.fluidized bed reactor. Reprinted with

the permission.<sup>13</sup> Copyright 2024, Elsevier Ltd. Effect of (a) Blending ratio. Reprinted with the

permission.<sup>14</sup> Copyright 2023, Elsevier Ltd. (b) Pressure. Reprinted with the permission.<sup>15</sup> Copyright

2022, Elsevier Ltd. (c) Temperature. Reprinted with the permission.<sup>16</sup> Copyright 2024, Elsevier Ltd. (d)

PA inlet distribution. Reprinted with the permission.<sup>17</sup> Copyright 2022, Elsevier Ltd. (e) PA velocity  
& ratio. Reprinted with the permission.<sup>18, 19</sup> Copyright 2021 and 2024, American Chemical Society. (f)

SA angle. Reprinted with the permission.<sup>13</sup> Copyright 2024, Elsevier Ltd. (g) Atmosphere. Reprinted  
with the permission.<sup>20, 21</sup> Copyright 2021, Elsevier Ltd. Copyright 2024, American Chemical Society.

(h) Particle diameter. Reprinted with the permission.<sup>22</sup> Copyright 2020, Elsevier Ltd.



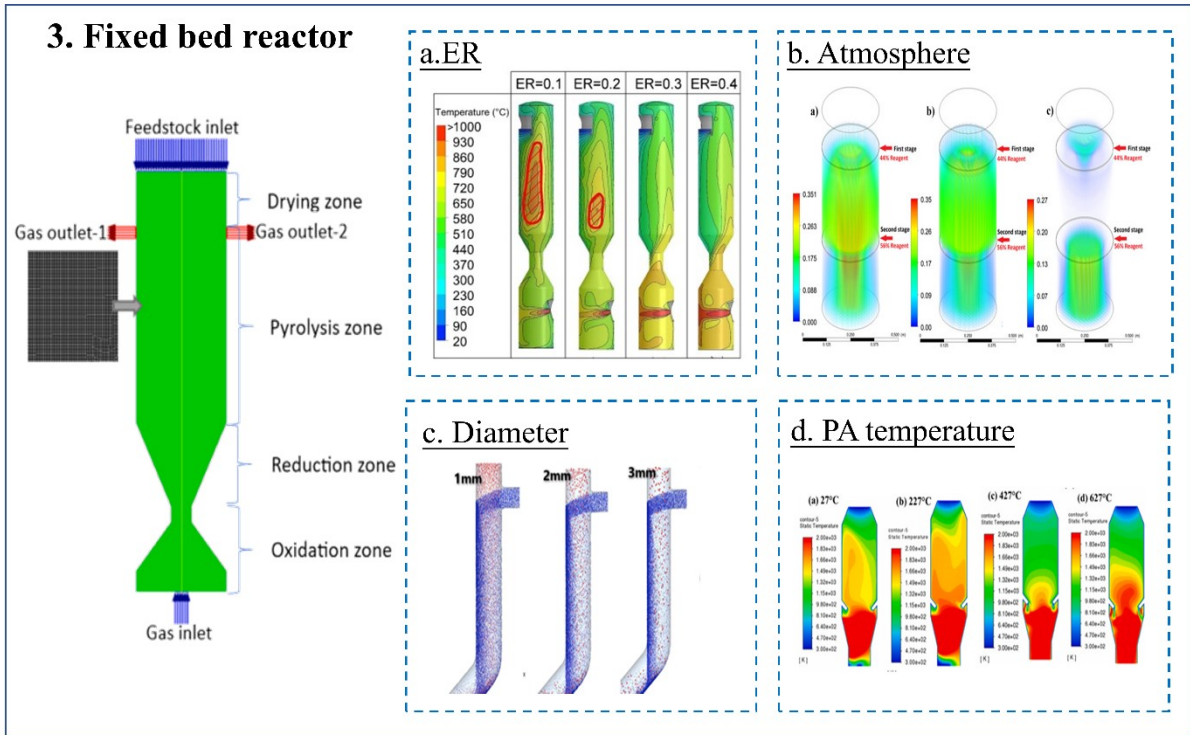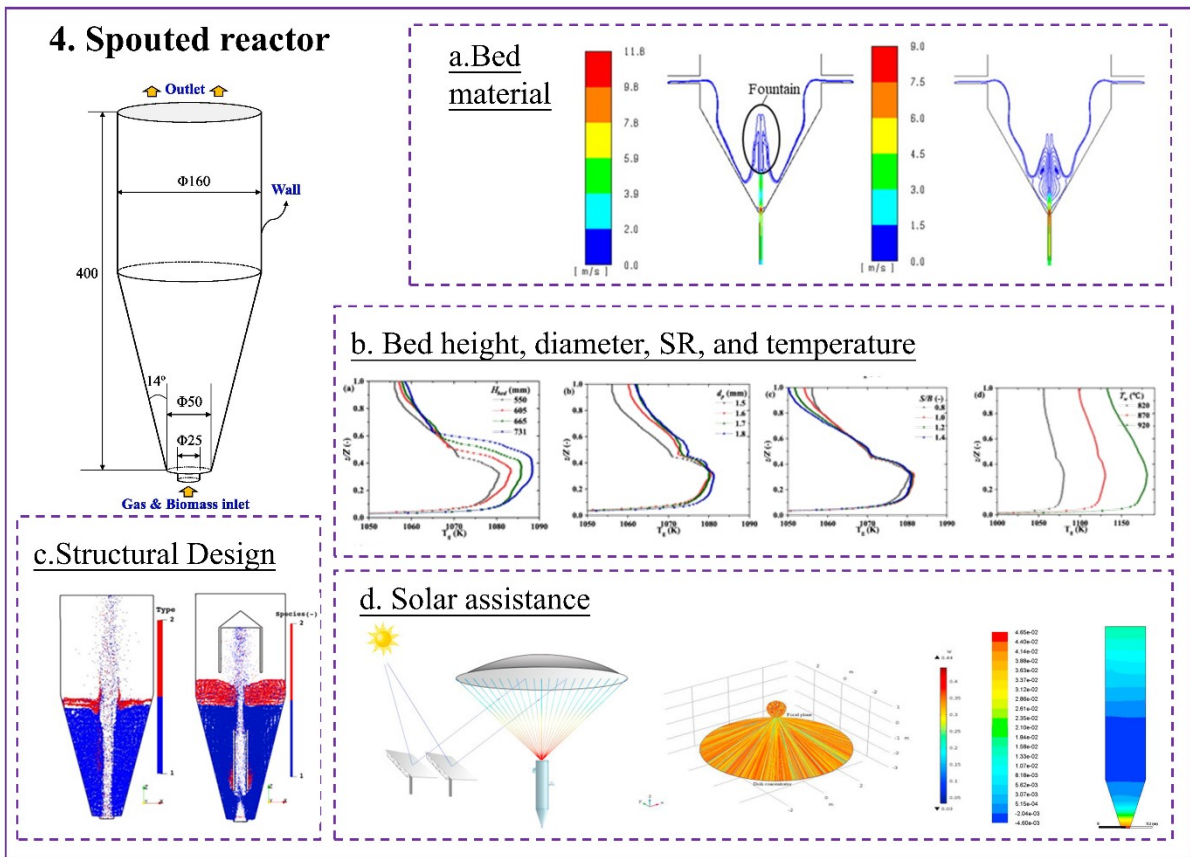

Fig. S8 Recent concentrations of local operational conditions in 3. fixed bed reactor and 4. spouted reactor. 3. Fixed bed reactor. Reprinted with the permission.<sup>23</sup> Copyright 2024, Elsevier Ltd. Effect of (a) ER. Reprinted with the permission.<sup>5</sup> Copyright 2023, Elsevier Ltd. (b) Atmosphere. Reprinted with

the permission.<sup>24</sup> Copyright 2021, Elsevier Ltd. (c) Diameter. Reprinted with the permission.<sup>25</sup>  
Copyright 2023, Elsevier Ltd. (d) PA temperature. Reprinted with the permission.<sup>26</sup> Copyright 2024,  
Elsevier Ltd. 4. Spouted reactor. Reprinted with the permission.<sup>27</sup> Copyright 2020, Elsevier Ltd. Effect  
of (a) Bed material. Reprinted with the permission.<sup>28</sup> Copyright 2020, Elsevier Ltd. (b) Bed height,  
diameter, SR, and temperature. Reprinted with the permission.<sup>29</sup> Copyright 2020, Elsevier Ltd. (c)  
Structural Design. Reprinted with the permission.<sup>27, 30</sup> Copyright 2020 and 2024, Elsevier Ltd. (d)  
Solar assistance. Reprinted with the permission.<sup>31</sup> Copyright 2020, Elsevier Ltd.

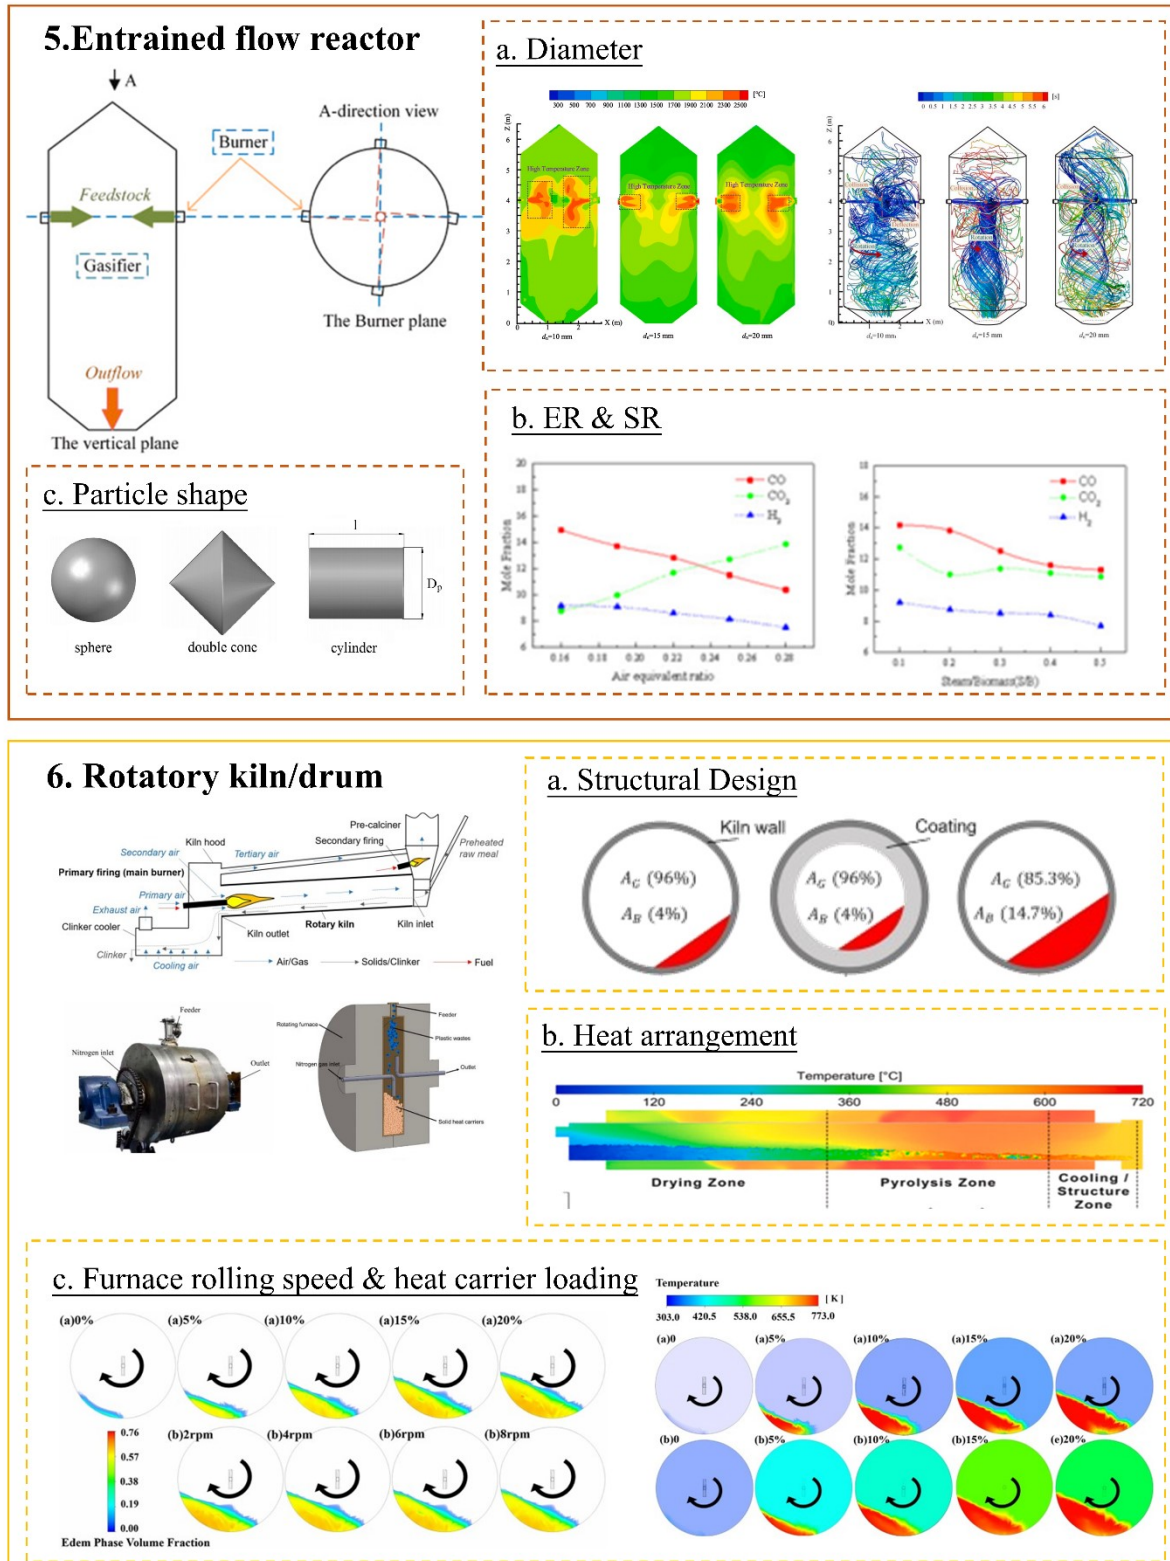

Fig. S9 Recent concentrations of local operational conditions in 5. 6ntrained flow reactor and 6. rotatory kiln/drum. (5) Entrained flow reactor. Reprinted with the permission.<sup>32</sup> Copyright 2024, Elsevier Ltd. Effect of (a) Diameter. Reprinted with the permission.<sup>32</sup> Copyright 2024, Elsevier Ltd. (b) ER and SR. Reprinted with the permission.<sup>33</sup> Copyright 2020, Elsevier Ltd. (c) Particle shape. Reprinted with the

permission.<sup>34</sup> Copyright 2022, Elsevier Ltd. (6) Rotatory kiln/drum. Reprinted with the permission.<sup>35,36</sup> Copyright 2020 and 2022, Elsevier Ltd. Effect of (a) Structural Design. Reprinted with the permission.<sup>36</sup> Copyright 2020, Elsevier Ltd. (b) Heat arrangement. Reprinted with the permission.<sup>37</sup> Copyright 2023, Elsevier Ltd. (c) Furnace rolling speed & heat carrier loading. Reprinted with the permission.<sup>35</sup> Copyright 2022, Elsevier Ltd.

1. P. Pradhan, A. Arora and S. M. Mahajani, *Bioresource Technology*, 2019, **272**, 535-544. doi: 10.1016/j.biortech.2018.10.073
2. X.-Y. Zhao, W. Jiang, Y.-F. Shan and J.-P. Cao, *Energy & Fuels*, 2021, **36**, 502-513. doi: 10.1021/acs.energyfuels.1c03818
3. S. Hameed, A. Sharma, V. Pareek, H. Wu and Y. Yu, *Biomass and Bioenergy*, 2019, **123**, 104-122. doi: 10.1016/j.biombioe.2019.02.008
4. H. Siddiqi, U. Kumari, S. Biswas, A. Mishra and B. C. Meikap, *Energy*, 2020, **204**, 117933. doi: 10.1016/j.energy.2020.117933
5. A. A. Erdogan and M. Z. Yilmazoglu, *Applied Energy*, 2024, **353**, 122014. doi: 10.1016/j.apenergy.2023.122014
6. R. Zhang, L. Wang, R. Deng and Y. Luo, *Applied Thermal Engineering*, 2024, **257**, 124156. doi: 10.1016/j.applthermaleng.2024.124156
7. X. Yang, Y. Liao, X. Ma and J. Zhou, *Applied Thermal Engineering*, 2022, **201**, 117706. doi: 10.1016/j.applthermaleng.2021.117706
8. X. Yang, Y. Liao, Y. Wang, X. Chen and X. Ma, *Fuel*, 2022, **314**, 122769. doi: 10.1016/j.fuel.2021.122769
9. M. Zheng, J. Sun, L. Gong, Y. Fan, J. Tu and J. Dong, *Applied Thermal Engineering*, 2024, **236**, 121763. doi: 10.1016/j.applthermaleng.2023.121763
10. X. Su, L. Ma, Q. Fang, C. Yin, H. Zhuang, Y. Qiao, C. Zhang and G. Chen, *Applied Thermal Engineering*, 2024, **238**, 122043. doi: 10.1016/j.applthermaleng.2023.122043
11. A. Zhou, H. Xu, X. Meng, W. Yang and R. Sun, *Chemical Engineering Journal*, 2021, **405**, 126604. doi: 10.1016/j.ccej.2020.126604
12. W. Zeng, Y. Wang, Q. Bu, S. Ma, H. Hu, D. Ma and H. Ma, *Process Safety and Environmental Protection*, 2024, **185**, 325-339. doi: 10.1016/j.psep.2024.03.017
13. X. Huang, X. Jin, L. Dong, R. Li, K. Yang, Y. Li, L. Deng and D. Che, *Journal of the Energy Institute*, 2024, **113**, 101550. doi: 10.1016/j.joei.2024.101550
14. B. Gürel, K. Kurtuluş, S. Yurdakul, M. Varol, A. Keçebaş and H. Gürbüz, *Energy*, 2023, **285**, 129482. doi: 10.1016/j.energy.2023.129482
15. S. Du, J. Wang, Y. Yu and Q. Zhou, *Renewable Energy*, 2023, **202**, 483-498. doi: 10.1016/j.renene.2022.11.073
16. Y. Makkawi and B. Mohamed, *Renewable Energy*, 2024, **224**, 120175. doi: 10.1016/j.renene.2024.120175
17. N. Raza, M. Ahsan, M. T. Mehran, S. R. Naqvi and I. Ahmad, *Powder Technology*, 2022, **405**, 117500. doi: 10.1016/j.powtec.2022.117500
18. Y. Liu, S. Liu, Y. Li, Y. Li and J. He, *ACS Omega*, 2021, **6**, 12530-12540. doi:

- 10.1021/acsomega.1c00270
19. J. Shen, J. Dai, H. Lin, S. Li, S. Gao, Y. Cheng, M. Patrascu and X. Gao, *Industrial & Engineering Chemistry Research*, 2024, **63**, 12688-12703. doi: 10.1021/acs.iecr.4c01882
  20. Q. Liu, W. Zhong, A. Yu and C.-H. Wang, *Powder Technology*, 2022, **395**, 43-59. doi: 10.1016/j.powtec.2021.09.049
  21. Z. Yang, Q. Hu, Q. Chen, Y. Q. Chen, H. Li, H. P. Yang and H. P. Chen, *Energy & Fuels*, 2024, **38**, 4273-4289. doi: 10.1021/acs.energyfuels.3c04754
  22. L. Lu, X. Gao, A. Gel, G. M. Wiggins, M. Crowley, B. Pecha, M. Shahnam, W. A. Rogers, J. Parks and P. N. Ciesielski, *Chemical Engineering Journal*, 2021, **421**, 127789. doi: 10.1016/j.cej.2020.127789
  23. K. W. Kuttin and L. Ding, *Biomass and Bioenergy*, 2024, **186**, 107270. doi: 10.1016/j.biombioe.2024.107270
  24. D. M. Y. Maya, E. E. S. Lora, R. V. Andrade, A. Ratner and J. D. M. Angel, *Renewable Energy*, 2021, **177**, 1014-1030. doi: 10.1016/j.renene.2021.06.051
  25. D. Bi, R. Kong, S. Liu, J. He, H. Sun and D. Yao, *International Communications in Heat and Mass Transfer*, 2023, **149**, 107132. doi: 10.1016/j.icheatmasstransfer.2023.107132
  26. P. C. Murugan, J. S. S and B. W. W, *Energy*, 2024, **307**, 132626. doi: 10.1016/j.energy.2024.132626
  27. S. Yang, S. Wang and H. Wang, *Chemical Engineering Journal*, 2021, **421**, 127787. doi: 10.1016/j.cej.2020.127787
  28. H. Boujjat, S. Rodat, S. Chuayboon and S. Abanades, *Chemical Engineering Science*, 2020, **228**, 115970. doi: 10.1016/j.ces.2020.115970
  29. F. Fan, S. Wang, S. Yang, J. Hu and H. Wang, *Applied Thermal Engineering*, 2020, **181**, 115917. doi: 10.1016/j.applthermaleng.2020.115917
  30. H. Yu, H. Sun, S. Yang, G. Bao and H. Wang, *Renewable Energy*, 2024, **223**, 120068. doi: 10.1016/j.renene.2024.120068
  31. C. Ma, Y. Zhou, J. Wang and X. Li, *International Journal of Hydrogen Energy*, 2020, **45**, 33136-33150. doi: 10.1016/j.ijhydene.2020.09.120
  32. Y. Lu, Z. Li, G. Jiang, C. Huang and Z. Chen, *Energy*, 2024, **292**, 130443. doi: 10.1016/j.energy.2024.130443
  33. L. Wang, X. Du, L. Xu and J. Sun, *Renewable Energy*, 2020, **162**, 1065-1075. doi: 10.1016/j.renene.2020.08.093
  34. C. B. Nguyen, M. Massoudi Farid, J. Scherer, Q. Guo, M. Gräbner and A. Richter, *Combustion and Flame*, 2022, **240**, 112040. doi: 10.1016/j.combustflame.2022.112040
  35. M. Zhang, Y. Zhang, D. Ma, A. Li, W. Fu, G. Ji and J. Dong, *Chemical Engineering Journal*, 2022, **445**, 136686. doi: 10.1016/j.cej.2022.136686
  36. C. Pieper, S. Wirtz, S. Schaefer and V. Scherer, *Fuel*, 2021, **283**, 118951. doi: 10.1016/j.fuel.2020.118951
  37. H. Khodaei, C. Álvarez-Bermúdez, S. Chapela, C. Olson, M. D. MacKenzie, M. A. Gómez and J. Porteiro, *Energy*, 2024, **288**, 129895. doi: 10.1016/j.energy.2023.129895
